# Supplementary material for: Photo-assisted effective and selective reduction of CO2to methanol on a Cu–ZnO–ZrO2catalyst
Source: Royal Society of Chemistry journal article supplement (doi:10.1039/d2nj03441g), 2022-01-01
Supplement: d2nj03441g1.pdf [file d2nj03441g1.pdf]

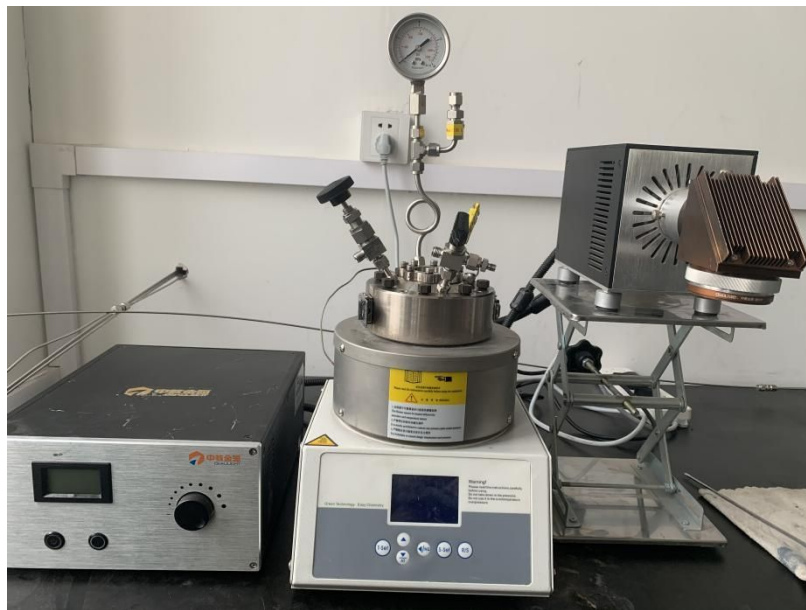

**Fig. S1.** Diagram of a photothermal synergistic catalytic reactor.

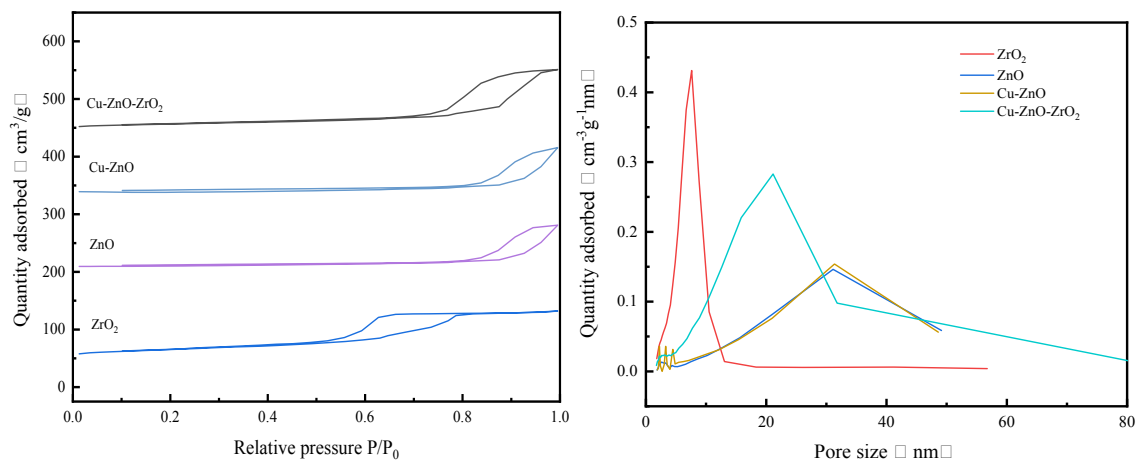

**Fig. S2.** (a)  $\text{N}_2$  sorption isotherms. (b) pore size distribution curves of the corresponding catalysts

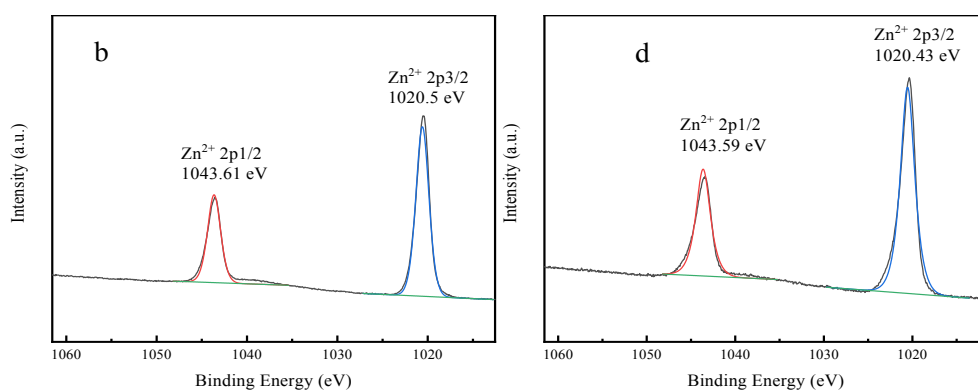

**Fig. S3.** XPS spectra of catalyst: (a) and (b) Cu and Zn narrowing spectra of Cu-ZnO and Cu-ZnO-ZrO<sub>2</sub> catalysts.

**Table S1.** Percentage of elements in the catalyst for semi-quantitative analysis of XPS.

| Catalyst                | Cu(%) | Zn(%) | Zr(%) | O(%)  | O <sub>v</sub> (%) | O <sup>2-</sup> (%) |
|-------------------------|-------|-------|-------|-------|--------------------|---------------------|
| Cu-ZnO                  | 0.33  | 45.91 |       | 53.76 | 40.04              | 59.96               |
| Cu-ZnO-ZrO <sub>2</sub> | 0.26  | 26.72 | 11.93 | 61.09 | 53.63              | 46.57               |

**Table S2.** CO<sub>2</sub>-TPD quantitative analysis results.

|                         | Peak 1                |                        | Peak 2                |                        |
|-------------------------|-----------------------|------------------------|-----------------------|------------------------|
|                         | adsorption quantity   | adsorption temperature | adsorption quantity   | adsorption temperature |
|                         | ( $\mu\text{mol/g}$ ) | ( $^{\circ}\text{C}$ ) | ( $\mu\text{mol/g}$ ) | ( $^{\circ}\text{C}$ ) |
| Cu-ZnO                  | 74.9                  | 262.6                  | 313.8                 | 411.3                  |
| Cu-ZnO-ZrO <sub>2</sub> | 939.0                 | 271.9                  | 1096.5                | 413.2                  |

**Table S3.** Controlled experiments under different experiment conditions.

| group | Catalyst                | Condition                        | Time (h) | Methanol yield ( $\text{g}\cdot\text{kg}_{\text{cat}}^{-1}\cdot\text{h}^{-1}$ ) |
|-------|-------------------------|----------------------------------|----------|---------------------------------------------------------------------------------|
| 1     | Blank                   | $\text{N}_2$                     | 6        | 0                                                                               |
| 2     | Blank                   | $\text{CO}_2$                    | 6        | 0                                                                               |
| 3     | Blank                   | $\text{CO}_2+\text{H}_2$         | 6        | 0                                                                               |
| 4     | Blank                   | $\text{CO}_2+\text{H}_2$ (light) | 6        | 0                                                                               |
| 5     | Cu-ZnO-ZrO <sub>2</sub> | $\text{N}_2$                     | 6        | 0                                                                               |
| 6     | Cu-ZnO-ZrO <sub>2</sub> | $\text{CO}_2+\text{H}_2$         | 6        | 44.88                                                                           |
| 7     | Cu-ZnO-ZrO <sub>2</sub> | $\text{CO}_2+\text{H}_2$ (light) | 6        | 65.84                                                                           |
